# Supplementary material for: Green Coffee Extract Blockades Haloperidol-Induced Catalepsy and Contralateral Rotations Induced by Apomorphine After Unilateral 6-OHDA Lesion on Striatum
Source: Research Square preprint supplement (doi:10.21203/rs.3.rs-129362/v1), 2020-12-21
Supplement: Supplementary file 3 [file 0bc042c851cc7e4e8012ee6e.xlsx]

## Sheet: Catalepsy
Catalepsy induced by haloperidol
Correspond to figure 3
A) Acute treatment acute					A) Repeated treatment (14 days)
Group	Total immobility time	Times left the bar	Index (B/C)		Group	Total immobility time	Times left the bar	Index (B/C)
Negative control	300	10	30		Negative control	143	10	14.3
Negative control	51	10	5.1		Negative control	113	10	11.3
Negative control	0	10	0		Negative control	100	10	10
Negative control	90	10	9		Negative control	120	10	12
Negative control	160	10	9		Negative control	110	10	11
Negative control	230	10	23		Negative control	102	10	10.2
Negative control	147	10	14.7		Mean	114.667	10	11.4667
Negative control	30	10	7.1		Standard deviation	15.6929	0	1.56929
Negative control	175	10	19.5		Standard error	6.40659	0	0.640659
Negative control	360	10	30		Vehicle	75	10	7.5
Negative control	40	10	4		Vehicle	600	3	200
Mean	143.909	10	13.7636		Vehicle	600	4	150
Standard deviation	116.502	0	10.4687		Vehicle	600	0	600
Standard error	35.1266	0	3.15644		Vehicle	600	7	85.7
Vehicle	600	9	66.7		Vehicle	600	5	120
Vehicle	600	6	100		Vehicle	600	3	200
Vehicle	94	10	9.4		Vehicle	475	10	47.5
Vehicle	600	3	200		Vehicle	600	0	600
Vehicle	600	9	66.7		Vehicle	600	1	600
Vehicle	600	10	60		Mean	535	4.3	261.07
Vehicle	600	3	200		Standard deviation	166.333	3.71334	241.519
Vehicle	600	3	200		Standard error	52.5991	1.17426	76.3749
Vehicle	600	7	85.7		CE 100 mg/kg	600	3	200
Vehicle	289	10	28.9		CE 100 mg/kg	600	5	120
Vehicle	600	7	85.7		CE 100 mg/kg	600	5	120
Vehicle	600	2	300		CE 100 mg/kg	600	9	66.7
Vehicle	600	5	120		CE 100 mg/kg	330	10	33
Mean	537.154	6.46154	117.162		CE 100 mg/kg	600	8	75
Standard deviation	158.485	3.01705	83.6967		CE 100 mg/kg	600	9	66.7
Standard error	43.956	0.836778	23.2133		CE 100 mg/kg	112	10	11.2
Caffeine	600	9	66.7		CE 100 mg/kg	600	6	100
Caffeine	600	9	66.7		CE 100 mg/kg	540	10	54
Caffeine	52	10	5.2		Mean	518.2	7.5	84.66
Caffeine	600	8	75		Standard deviation	165.909	2.54951	53.5206
Caffeine	69	10	6.9		Standard error	52.465	0.806226	16.9247
Caffeine	30	10	3		CE 400 mg/kg	164	10	16.4
Caffeine	190	10	19		CE 400 mg/kg	60	10	6
Caffeine	264	10	26.4		CE 400 mg/kg	426	10	42.6
Caffeine	600	9	66.7		CE 400 mg/kg	136	10	13.6
Caffeine	131	10	13.1		CE 400 mg/kg	151	10	15.1
Caffeine	138	10	13.8		CE 400 mg/kg	272	10	27.2
Caffeine	491	10	49.1		CE 400 mg/kg	100	10	10
Caffeine	580	10	58		CE 400 mg/kg	237	10	23.7
Mean	334.231	9.61538	36.1231		CE 400 mg/kg	600	6	100
Standard deviation	244.202	0.650444	27.819		CE 400 mg/kg	90	10	9
Standard error	67.7294	0.180401	7.71559		Mean	223.6	9.6	26.36
CE 100 mg/kg	600	6	100		Standard deviation	170.474	1.26491	28.0213
CE 100 mg/kg	600	5	120		Standard error	53.9086	0.4	8.8611
CE 100 mg/kg	172	10	17.2
CE 100 mg/kg	216	10	21.6
CE 100 mg/kg	88	10	8.8
CE 100 mg/kg	223	10	22.3
CE 100 mg/kg	0	10	0
CE 100 mg/kg	600	5	120
CE 100 mg/kg	600	7	85.7
CE 100 mg/kg	120	10	12
CE 100 mg/kg	66	10	6.6
CE 100 mg/kg	600	4	150
CE 100 mg/kg	80	10	8
Mean	305	8.23077	51.7077
Standard deviation	249.924	2.42053	54.3716
Standard error	69.3164	0.671335	15.08
CE 400 mg/kg	600	5	120
CE 400 mg/kg	180	10	18
CE 400 mg/kg	301	10	30.1
CE 400 mg/kg	600	2	300
CE 400 mg/kg	272	10	27.2
CE 400 mg/kg	600	6	100
CE 400 mg/kg	115	10	11.5
CE 400 mg/kg	186	10	18.6
CE 400 mg/kg	125	10	12.5
CE 400 mg/kg	77	10	7.7
CE 400 mg/kg	600	7	85.7
CE 400 mg/kg	70	10	7
CE 400 mg/kg	600	10	60
Mean	332.769	8.46154	61.4077
Standard deviation	229.438	2.63361	81.1559
Standard error	63.6346	0.730432	22.5086

## Sheet: Rotational behavior (Exp. 1A)
Experiment 1A: Effect of acute treatment with CE on the rotational behavior of rats with lesion on MFB
Correspond to figure 4
Group	Coffee or water (14th day)		Apomorphine (15th day)		Methamphetamine (16th day)
	ipsilateral	contralateral	ipsilateral	contralateral	ipsilateral	contralateral
Sham-operated	10	18	0	1	22	261	Note: the sham-operated group received CE400 on the 14th day
Sham-operated	1	1	0	0	28	18
Sham-operated	2	2	1	0	4	53
Sham-operated	0	0	0	0	18	493
Sham-operated	28	10	1	4	271	0
Sham-operated	3	1	0	0	9	7
Sham-operated	0	0	14	82	4	7
Sham-operated	0	0	0	0	1	381
Sham-operated	0	0	0	0	16	27
Sham-operated	3	0	0	281	187	0
Mean	4.7	3.2	1.6	36.8	56	124.7
Standard deviation	8.73117	6.03324	4.37671	89.5418	93.6969	184.026
Standard error	2.76104	1.90788	1.38404	28.3156	29.6296	58.1941
Vehicle	7	1	0	490	603	0	This group receive water on the 14th day
Vehicle	4	9	2	1	4	138
Vehicle	0	0	0	3	1	70
Vehicle	1	2	0	147	595	0
Vehicle	0	0	0	264	150	0
Vehicle	6	3	0	4	32	19
Vehicle	0	0	0	223	302	0
Vehicle	0	0	0	0	298	0
Vehicle	7	0	0	186	0	1
Vehicle	0	0	4	44	179	0
Mean	2.5	1.5	0.6	136.2	216.4	22.8
Standard deviation	2.97594	2.69539	1.30226	155.81	227.299	44.9961
Standard error	0.941074	0.852357	0.411811	49.2715	71.8781	14.229
Caffeine	0	0	0	0	4	0
Caffeine	3	0	0	123	115	0
Caffeine	0	2	0	0	20	11
Caffeine	0	0	0	0	278	0
Caffeine	0	0	0	0	1	17
Caffeine	9	0	0	277	177	0
Caffeine	21	0	0	122	318	0
Caffeine	0	0	0	0	30	4
Caffeine	23	0	0	0	6	0
Caffeine	24	0	0	382	219	0
Caffeine	70	3	0	331	313	0
Caffeine	80	0	0	276	116	0
Caffeine	110	0	6	256	24	0
Mean	26.1538	0.384615	0.461538	135.923	124.692	2.46154
Standard deviation	36.6784	0.960769	1.6641	148.257	123.204	5.37921
Standard error	10.1728	0.266469	0.461538	41.1192	34.1706	1.49192
CE 100 mg/kg	52	0	0	221	500	1
CE 100 mg/kg	0	0	0	0	34	94
CE 100 mg/kg	0	0	0	40	12	29
CE 100 mg/kg	11	0	0	119	342	0
CE 100 mg/kg	25	13	1	92	124	9
CE 100 mg/kg	4	19	0	166	343	0
CE 100 mg/kg	1	2	0	37	40	0
CE 100 mg/kg	12	0	0	33	1543	3
CE 100 mg/kg	0	0	0	127	288	9
CE 100 mg/kg	1	0	7	81	415	3
CE 100 mg/kg	1	0	0	0	118	280
CE 100 mg/kg	0	0	0	462	467	4
CE 100 mg/kg	0	0	0	0	23	222
Mean	8.23077	2.61538	0.615385	106	326.846	50.3077
Standard deviation	15.0895	6.09013	1.93815	126.868	406.477	93.3884
Standard error	4.18507	1.6891	0.537545	35.1869	112.736	25.9013
CE 400 mg/kg	3	2	0	0	9	68
CE 400 mg/kg	24	50	0	1	9	11
CE 400 mg/kg	0	0	1	153	762	0
CE 400 mg/kg	17	0	0	276	400	0
CE 400 mg/kg	4	0	0	198	475	0
CE 400 mg/kg	20	7	0	0	0	0
CE 400 mg/kg	15	7	0	0	0	0
CE 400 mg/kg	11	2	10	192	256	0
CE 400 mg/kg	53	0	0	95	165	0
CE 400 mg/kg	39	0	0	173	504	0
CE 400 mg/kg	12	0	0	119	390	0
CE 400 mg/kg	5	10	0	0	149	0
CE 400 mg/kg	0	1	0	0	296	5
CE 400 mg/kg	3	0	0	94	1130	1
CE 400 mg/kg	6	0	0	248	471	4
Mean	14.1333	5.26667	0.733333	103.267	334.4	5.93333
Standard deviation	15.0801	12.7921	2.57645	99.6956	315.834	17.4416
Standard error	3.89367	3.30291	0.665237	25.7413	81.548	4.5034

## Sheet: Rotational behavior (Exp. 1B)
Experiment 1B: Effect of repeated treatment with CE on the rotational behavior of rats with lesion on MFB
Correspond to figure 5
Group	Apomorphine (15th day)		Methamphetamine (16th day)		Apomorphine (29th day)		Methamphetamine (16th day)
	ipsilateral	contralateral	ipsilateral	contralateral	ipsilateral	contralateral	ipsilateral	contralateral
Sham-operated	0	0	16	64	0	0	13	210
Sham-operated	0	0	28	107	0	0	0	66
Sham-operated	0	0	11	1	2	0	102	0
Sham-operated	0	0	52	3	0	0	1	15
Sham-operated	0	0	27	82	0	0	0	147
Sham-operated	0	0	54	1	0	1	17	1
Sham-operated	0	3	189	0	12	0	42	3
Sham-operated	0	0	0	40	9	15	23	12
Sham-operated	0	0	0	71	16	17	30	0
Sham-operated	0	12	92	0	0	0	0	0
Sham-operated	1	2	59	1	0	0	23	6
Sham-operated	0	0	12	92	0	0	43	0
Sham-operated	0	0	0	10	0	0	0	0
Mean	0.0769231	1.30769	41.5385	36.3077	3	2.53846	22.6154	35.3846
Standard deviation	0.27735	3.35123	52.3524	41.1793	5.53775	5.99466	28.5556	67.2081
Standard error	0.0769231	0.929465	14.5199	11.4211	1.5359	1.66262	7.9199	18.6402
Vehicle	0	29	8	127	0	17	37	0
Vehicle	0	0	98	0	0	264	1031	3
Vehicle	0	257	250	0	0	126	330	0
Vehicle	0	137	265	1	0	170	204	0
Vehicle	1	118	321	0	0	0	45	0
Vehicle	14	611	267	1	0	12	0	49
Vehicle	2	1	267	5	0	0	2	254
Vehicle	0	292	667	4	0	372	676	1
Vehicle	0	68	108	2	0	699	649	5
Vehicle	0	243	78	0	0	292	372	0
Vehicle	0	96	309	0	0	199	624	2
Vehicle	0	26	845	2	0	367	292	0
Mean	1.41667	156.5	290.25	11.8333	0	209.833	355.167	26.1667
Standard deviation	4.0104	175.247	242.939	36.3064	0	207.383	329.511	73.0751
Standard error	1.1577	50.5895	70.1305	10.4807	0	59.8662	95.1218	21.095
Caffeine	0	0	87	0	0	0	0	159
Caffeine	0	291	32	0	0	363	99	0
Caffeine	0	190	63	0	0	179	507	0
Caffeine	0	0	202	0	0	338	473	0
Caffeine	0	214	158	0	0	311	307	12
Caffeine	0	352	221	0	0	0	99	0
Caffeine	47	310	101	0	0	214	151	0
Caffeine	0	18	103	1	0	36	187	0
Caffeine	2	291	56	0	0	195	203	0
Caffeine	0	292	183	0	0	234	167	0
Caffeine	0	320	196	0	0	325	465	0
Caffeine	0	279	71	2	0	387	256	0
Caffeine	0	108	149	1	0	297	251	0
Mean	3.76923	205	124.769	0.307692	0	221.462	243.462	13.1538
Standard deviation	13.001	129.881	63.1719	0.630425	0	135.605	156.978	43.9466
Standard error	3.60582	36.0226	17.5207	0.174848	0	37.6099	43.5377	12.1886
CE 100 mg/kg	2	323	239	0	1	191	434	0
CE 100 mg/kg	0	82	227	0	0	387	188	0
CE 100 mg/kg	0	192	210	0	0	0	0	85
CE 100 mg/kg	0	0	13	14	0	0	0	0
CE 100 mg/kg	2	148	283	4	0	200	449	0
CE 100 mg/kg	0	269	260	3	0	783	364	0
CE 100 mg/kg	0	227	0	36	0	186	265	0
CE 100 mg/kg	0	5	345	1	4	0	2	14
CE 100 mg/kg	0	411	195	0	0	270	345	0
CE 100 mg/kg	0	285	128	16	1	474	492	0
CE 100 mg/kg	0	3	80	1	0	271	129	0
CE 100 mg/kg	0	28	0	91	72	53	215	3
CE 100 mg/kg	1	178	439	2	0	255	257	0
CE 100 mg/kg	2	170	455	3					missing data
Mean	0.5	165.786	205.286	12.2143	6	236.154	241.538	7.84615
Standard deviation	0.85485	130.228	149.408	24.7765	19.862	221.321	173.109	23.5048
Standard error	0.228468	34.8048	39.931	6.62179	5.50873	61.3833	48.0117	6.51905
CE 400 mg/kg	3	282	466	0	0	0	1	130
CE 400 mg/kg	0	0	577	0	0	416	390	0
CE 400 mg/kg	0	288	256	0	0	451	326	0
CE 400 mg/kg	12	5	48	0	0	289	500	2
CE 400 mg/kg	1	4	51	85	0	0	70	0
CE 400 mg/kg	2	244	194	0	0	412	373	0
CE 400 mg/kg	0	146	361	0	0	279	603	0
CE 400 mg/kg	0	299	371	0	0	3	207	0
CE 400 mg/kg	0	216	374	0	0	431	675	0
CE 400 mg/kg	0	315	525	5	0	191	932	0
CE 400 mg/kg	0	0	1	146	0	0	38	0
CE 400 mg/kg	1	194	128	0	0	106	0	423
CE 400 mg/kg	0	104	133	0	0	0	693	0
CE 400 mg/kg	0	0	490	0	10	24	163	0
CE 400 mg/kg	0	164	417	0	0	234	396	0
Mean	1.26667	150.733	292.8	15.7333	0.666667	189.067	357.8	37
Standard deviation	3.10453	123.399	189.682	42.1332	2.58199	181.303	283.836	111.899
Standard error	0.801586	31.8615	48.9757	10.8788	0.666667	46.8121	73.2861	28.8921

## Sheet: Rotational behavior (Exp. 2)
Experiment 2: Effect of pre- and post-treatment with CE on the rotational behavior of rats with striatal lesion
Correspond to figure 6
Group	Apomorphine (15th day)		Methamphetamine (16th day)
	ipsilateral	contralateral	ipsilateral	contralateral
Sham-operated	182	1	88	0
Sham-operated	0	38	21	6
Sham-operated	4	18	24	16
Sham-operated	48	3	74	44
Sham-operated	0	0	14	51
Sham-operated	1	30	123	1
Sham-operated	0	5	2	7
Sham-operated	0	0	1	20
Sham-operated	0	66	0	72
Sham-operated	0	0	170	54
Sham-operated	22	12	36	5
Mean	23.3636	15.7273	50.2727	25.0909
Standard deviation	54.7033	21.1712	56.5351	25.4537
Standard error	16.4937	6.38335	17.046	7.67458
Vehicle	12	261	466	0
Vehicle	0	133	17	214
Vehicle	0	54	102	6
Vehicle	2	0	68	0
Vehicle	95	7	0	0
Vehicle	6	38	33	12
Vehicle	2	243	527	0
Vehicle	0	9	33	86
Vehicle	51	0	41	5
Vehicle	0	34	36	46
Vehicle	0	126	317	8
Vehicle	0	125	39	94
Vehicle	0	1	5	5
Vehicle	2	123	15	235
Vehicle	4	42	320	2
Mean	11.6	77.9	134.6	47.5333
Standard deviation	26.4786	99.9005	178.937	78.2741
Standard error	6.83674	25.7942	46.2014	20.2103
Caffeine	12	39	28	6
Caffeine	130	36	135	0
Caffeine	3	44	73	1
Caffeine	6	23	7	4
Caffeine	0	80	10	140
Caffeine	11	0	30	6
Caffeine	27	2	1	43
Caffeine	0	93	27	40
Caffeine	70	34	38	25
Caffeine	41	51	51	9
Caffeine	28	0	28	52
Caffeine	18	0	43	0
Caffeine	0	1	11	12
Caffeine	56	0	57	9
Mean	28.7143	28.7857	38.5	24.7857
Standard deviation	36.3962	30.9992	34.4333	37.3881
Standard error	9.72729	8.28489	9.20269	9.9924
CE 100 mg/kg	0	0	239	5
CE 100 mg/kg	0	6	112	5
CE 100 mg/kg	19	96	0	0
CE 100 mg/kg	0	68	27	13
CE 100 mg/kg	5	1	15	0
CE 100 mg/kg	0	1	23	42
CE 100 mg/kg	54	31	46	0
CE 100 mg/kg	1	13	33	0
CE 100 mg/kg	80	18	11	19
CE 100 mg/kg	15	6	7	34
CE 100 mg/kg	0	110	58	2
CE 100 mg/kg	12	12	14	28
CE 100 mg/kg	3	12	86	48
Mean	14.5385	28.7692	51.6154	15.0769
Standard deviation	24.7205	37.6345	65.0929	17.4091
Standard error	7.13619	10.8642	18.0535	4.82842
CE 400 mg/kg	152	3	9	8
CE 400 mg/kg	20	49	256	0
CE 400 mg/kg	0	118	201	0
CE 400 mg/kg	9	4	89	1
CE 400 mg/kg	29	11	29	1
CE 400 mg/kg	0	57	5	5
CE 400 mg/kg	38	2	31	22
CE 400 mg/kg	2	0	65	0
CE 400 mg/kg	6	1	24	36
CE 400 mg/kg	0	2	16	2
CE 400 mg/kg	0	23	188	15
CE 400 mg/kg	0	44	85	8
CE 400 mg/kg	8	35	3	13
CE 400 mg/kg	0	7	7	6
CE 400 mg/kg	18	33	38	180
Mean	18.8	25.9333	69.7333	19.8
Standard deviation	38.7265	32.148	81.0436	45.4253
Standard error	9.99914	8.30058	20.9254	11.7288

## Sheet: Monoamines (MFB lesion)
Central monoamines dosage by HPLC (striatum from animals of Exp. 1B)
Correspond to Table 1
Group	Monoamines and metabolites (right side - lesioned)							Monoamines and metabolites (left side - non lesioned)
	NE	DA	DOPAC	HVA	5-HT	5-HIAA		NE	DA	DOPAC	HVA	5-HT	5-HIAA
Sham-operated	5.13737	6.39877	72.7484	7.23405	10.1458	4.00538		1.06016	2.82371	0	0	10.127	8.88101
Sham-operated	3.9654	98.8879	7.66124	3.39579	9.03072	4.18664		10.5145	66.248	5.5694	2.55215	6.43043	4.04735
Sham-operated	11.4078	24.649	2.46663	0	7.78785	4.98738
Sham-operated	4.07705	85.2428	6.25502	4.25221	12.4209	8.38515		7.88994	86.336	4.74988	0	11.3204	7.48135
Sham-operated	7.43863	98.1181	6.13827	3.89489	10.637	7.12532		6.51523	97.3425	5.33114	1.7399	10.5505	5.65699
Sham-operated	9.83893	99.4304	7.24968	5.12383	11.0751	7.80693		4.66089	48.7809	2.99817	2.30688	4.90725	2.87569
Sham-operated	18.7651	87.3733	3.62205	2.90351	8.161	4.14496		8.31052	45.0239	5.25838	2.35668	16.9543	2.57694
Mean	8.66147	71.4429	15.163	3.82918	9.89405	5.80597		6.49187	57.7592	3.9845	1.4926	10.0483	5.25322
Standard deviation	5.29146	38.9716	25.4629	2.20453	1.66234	1.90132		3.29546	33.8119	2.16255	1.18737	4.2211	2.55177
Standard error	1.99998	14.7299	9.62409	0.833236	0.628304	0.718631		1.34537	13.8037	0.882855	0.48474	1.72326	1.04176
Vehicle	6.89599	31.95	4.92535	3.09113	12.5626	7.7363		5.58868	36.3412	4.80428	2.95555	8.6558	5.52703
Vehicle	10.6037	91.3546	10.159	4.75535	14.121	8.12222		2.82495	61.0893	5.52729	1.0293	9.85429	5.36677
Vehicle	0	6.39064	0	0.572041	5.33123	4.86825		2.44909	80.6581	4.93425	2.09338	8.4743	4.76816
Vehicle	2.57469	3.15364	1.12757	1.72938	7.7811	5.02376		6.84391	62.3783	3.46782	1.63156	9.05021	4.98357
Vehicle	7.39243	38.999	5.26803	4.75381	22.9759	16.5749		5.64677	70.416	3.91952	2.3303	13.2906	9.21624
Mean	5.49335	34.3696	4.296	2.98034	12.5544	8.46508		4.67068	62.1766	4.53063	2.00802	9.86505	5.97236
Standard deviation	4.19478	35.4677	4.00658	1.84885	6.81947	4.77486		1.92747	16.4176	0.826762	0.726046	1.98716	1.83818
Standard error	1.87596	15.8616	1.7918	0.826829	3.04976	2.13538		0.861991	7.34216	0.369739	0.324698	0.888686	0.822058
Caffeine	7.16491	32.9228	5.96722	0.916823	18.3671	10.638		3.35869	106.363	10.4107	4.40329	8.21842	3.43324
Caffeine	0.658257	7.26123	0.849715	0.403294	7.84516	4.60486		2.00455	89.8248	7.5261	3.2827	9.17795	6.12606
Caffeine	0	0.694455	0	0	7.75696	8.37716		8.84281	52.4355	3.40323	0.552614	7.01696	5.0092
Caffeine	9.07052	78.3772	8.94126	6.03988	11.9749	9.90708		2.92987	8.65106	1.7497	1.31978	19.2816	14.1314
Caffeine	9.56951	6.9517	5.31394	7.96157	16.8998	0		0.929811	11.5045	0.845039	0.447104	1.48318	1.09988
								15.5919	136.622	10.6943	11.962	22.9229	0
Caffeine	18.7651	87.3733	3.62205	2.90351	8.161	4.14496		8.31052	45.0239	5.25838	2.35668	16.9543	2.57694
Mean	7.53805	35.5968	4.1157	3.03751	11.8341	6.27868		5.99545	64.3464	5.69822	3.47488	12.1508	4.62525
Standard deviation	6.88208	38.366	3.34662	3.28455	4.78305	4.08287		5.22011	48.387	3.98151	4.01106	7.68566	4.69406
Standard error	2.8096	15.6628	1.36625	1.34091	1.95267	1.66683		1.97302	18.2886	1.50487	1.51604	2.90491	1.77419
CE 100 mg/kg	2.94103	45.0796	4.15238	2.66707	9.76266	9.27259		5.05691	89.8216	7.49857	4.25498	9.53148	7.10251
CE 100 mg/kg	4.39525	4.13583	2.70333	3.02295	13.4568	8.8595		4.12217	149.39	11.4278	2.0081	9.82141	5.97685
CE 100 mg/kg	4.14297	12.0419	0	0	11.5351	31.7503		6.08242	155.822	6.80443	4.57425	7.17815	21.9486
CE 100 mg/kg	3.59062	70.1115	3.15595	1.83341	10.1584	5.73072		4.53026	141.58	6.64325	6.81772	12.9412	7.99494
Mean	3.76747	32.8422	2.50291	1.88086	11.2282	13.9033		4.94794	134.153	8.09351	4.41376	9.86806	10.7557
Standard deviation	0.64534	30.5257	1.77501	1.34937	1.66864	12.0026		0.847599	30.1227	2.25362	1.96784	2.36609	7.50745
Standard error	0.32267	15.2629	0.887503	0.674685	0.834318	6.00132		0.423799	15.0614	1.12681	0.983921	1.18304	3.75373
CE 400 mg/kg	8.5724	66.2048	6.2993	1.55683	9.90897	7.80153		8.30845	7.96827	0	0	12.4036	7.4189
CE 400 mg/kg	1.59717	64.8349	5.6383	2.30056	9.00432	5.11876		0	169.63	15.9142	6.29959	5.03101	0.883064
CE 400 mg/kg	3.85416	2.80048	1.89675	1.58955	19.3299	13.1897		8.00402	98.6356	10.1327	3.84502	17.4981	10.5431
CE 400 mg/kg	6.1143	3.12591	2.76146	1.29554	13.3578	9.156		24.7988	26.243	4.85004	3.14865	9.6819	6.15834
CE 400 mg/kg	0	7.18386	0	0	0	16.6165		11.6248	131.835	5.45612	4.26637	5.27554	13.0882
CE 400 mg/kg	1.96731	146.119	10.5964	6.25232	13.2001	9.94502		6.56011	121.38	8.1776	5.95778	11.6752	7.21933
CE 400 mg/kg	0	6.86612	0	0.404971	14.0664	0		0.508895	7.53512	0.502311	0.737309	1.32544	0.469125
Mean	3.15791	42.4479	3.8846	1.91425	11.2668	8.83251		8.54359	80.4609	6.43329	3.46496	8.9844	6.54
Standard deviation	3.22335	53.9152	3.85891	2.06262	5.98422	5.38186		8.32223	65.9646	5.57736	2.40077	5.47639	4.63932
Standard error	1.21831	20.378	1.45853	0.779596	2.26182	2.03415		3.14551	24.9323	2.10805	0.907404	2.06988	1.7535

## Sheet: Monoamines (striatal lesion)
Central monoamines dosage by HPLC (striatum from animals of Exp. 2)
Correspond to Table 2
Group	Monoamines and metabolites (right side - lesioned)							Monoamines and metabolites (left side - non lesioned)
	NE	DA	DOPAC	HVA	5-HT	5-HIAA		NE	DA	DOPAC	HVA	5-HT	5-HIAA
Sham-operated	29.3857	71.9006	10.1642	8.43886	12.244	14.0993		11.292	59.2267	6.64801	4.69386	6.86491	6.23086
Sham-operated	10.0907	69.0469	6.2521	3.90463	9.81268	6.78884		20.5289	48.4127	3.72074	0	6.85866	5.01704
Sham-operated	94.0645	69.1687	50.0192	53.7225	56.5192	52.3689		20.9485	62.5832	3.57229	0	5.76379	2.94309
Sham-operated	94.0645	53.7225	50.0192	53.7225	56.5192	52.3689		20.9485	0	3.57229	0	5.76379	2.94309
Sham-operated	1.47515	153.612	13.2112	6.6145	7.09784	5.49585		9.62915	62.7044	6.13396	2.87089	2.52977	2.54471
Sham-operated	6.7263	125.79	12.8464	7.96551	10.8693	7.52308		1.89918	111.294	10.7734	4.44317	5.69703	3.59141
Sham-operated	3.82239	143.162	0.328973	2.44184	6.65231	2.27462		3.97239	123.979	7.99981	6.36555	9.31984	1.05813
Sham-operated	8.16712	194.238	17.8072	6.91022	14.0544	9.5945		4.08532	166.366	15.8413	8.60501	13.6754	11.7039
Mean	30.9745	110.08	20.081	17.9651	21.7211	18.8143		11.663	79.3207	7.28273	3.37231	7.05915	4.50403
Standard deviation	39.8478	51.1441	19.1871	22.1606	21.6164	20.9833		8.1698	51.8247	4.2744	3.24263	3.2665	3.3059
Standard error	14.0883	18.0822	6.78367	7.83495	7.64256	7.41873		2.88846	18.3228	1.51123	1.14644	1.15488	1.16881
Vehicle	23.9203	86.4699	9.48766	8.64174	10.4308	8.20645		5.80964	45.0566	4.571	3.44252	6.39605	2.934
Vehicle	5.84773	24.928	1.81382	1.63426	5.05787	1.81448		10.7966	28.663	1.8989	0.945178	3.42655	1.6938
Vehicle	13.4707	33.6222	4.24166	3.79296	6.16768	3.14901		1.58457	12.8777	0.271171	0.611944	1.36449	0.905582
Vehicle	4.17899	50.7901	4.87497	5.13508	7.85806	5.50897		7.7778	79.55	4.69824	1.16627	9.98891	9.03347
Vehicle	6.43923	89.2437	8.29611	6.08745	11.1311	5.3173		4.69431	134.696	11.1986	7.21811	6.99701	2.73879
Vehicle	32.3697	46.2834	6.0031	4.24488	7.52185	2.96872		6.59524	103.008	10.0814	2.04252	6.23578	3.11234
Vehicle	1.18206	125.691	10.3507	4.40005	0	10.1496		2.70498	99.4373	8.61835	2.11604	0	5.55591
Mean	12.487	65.2898	6.43828	4.84806	6.88106	5.30207		5.70903	71.8984	5.90539	2.50608	4.91554	3.71056
Standard deviation	11.5794	36.2263	3.07953	2.16089	3.72404	3.00612		3.10977	44.35	4.16036	2.28278	3.48798	2.75618
Standard error	4.37659	13.6923	1.16395	0.816741	1.40755	1.13621		1.17538	16.7627	1.57247	0.862808	1.31833	1.04174
Caffeine	11.3472	31.5598	3.35029	2.25142	9.72906	4.47889		21.6943	22.6565	2.54797	2.11837	13.3312	6.34531
Caffeine	9.38635	8.5165	0.483564	0	4.41078	6.13494		16.9933	3.26288	0	0	3.41769	5.60568
Caffeine	7.06669	24.4275	3.86267	1.92809	5.14709	3.03315		5.32699	22.7082	1.6523	1.48873	4.60747	1.6529
Caffeine	19.3775	31.5691	2.55457	2.44993	9.76486	2.74164		11.8783	32.4963	2.09793	0	8.4507	2.78141
Caffeine	21.0848	14.8874	5.31812	5.72595	3.49595	4.69871		13.5581	29.0884	3.43579	4.68444	4.33177	3.53382
Caffeine	20.0778	98.1804	6.16865	9.05111	22.4959	0		10.8937	138.421	4.58126	1.10933	12.9497	0
Caffeine	4.766	95.8015	10.4368	6.07699	0	12.9249		16.3953	65.6622	6.19722	1.98918	0	16.9663
Caffeine	14.0633	133.167	17.1746	9.93983	16.9512	14.1772		1.77597	163.646	16.1376	6.85781	9.6354	8.76217
Mean	13.3962	54.7636	6.16865	4.67792	8.99936	6.02368		12.3145	59.7426	4.58126	2.28098	7.09048	5.70595
Standard deviation	6.26554	46.9677	5.328	3.58896	7.49931	4.98943		6.43836	59.3297	5.03332	2.36769	4.76809	5.32932
Standard error	2.2152	16.6056	1.88373	1.26889	2.65141	1.76403		2.2763	20.9762	1.77955	0.837106	1.68578	1.8842
CE 100 mg/kg	8.0791	55.5107	6.73605	3.14204	9.64716	6.10999		11.99	33.6527	3.91162	2.26833	9.65379	7.00571
CE 100 mg/kg	3.24017	81.2773	6.63816	5.78737	6.06802	2.39186		0	105.282	8.61969	7.45436	7.86926	2.39773
CE 100 mg/kg	27.161	61.3945	7.05018	9.24264	12.0902	10.795		11.8219	44.8986	4.12421	2.72727	12.6766	4.80927
CE 100 mg/kg	3.54696	120.84	9.45247	5.59368	8.70461	4.19489		3.54341	125.781	12.1832	3.93252	7.14001	4.44375
CE 100 mg/kg	5.69181	38.5436	2.92267	1.09232	4.96929	2.5585		7.48186	49.2229	4.64727	2.17071	9.67356	4.55663
CE 100 mg/kg	3.66105	55.4317	3.83438	1.9641	6.6559	1.59999		3.65553	53.1854	3.98925	2.33129	4.05342	1.96499
CE 100 mg/kg	10.1364	69.5987	10.6188	3.8683	6.36678	5.93507		6.94057	144.193	18.0962	9.4387	13.7315	12.2569
Mean	8.78808	68.9424	6.75039	4.38435	7.78599	4.7979		6.49047	79.4594	7.93877	4.33188	9.25687	5.34786
Standard deviation	8.50498	26.4259	2.75448	2.75495	2.48363	3.17212		4.4479	44.535	5.45974	2.92959	3.3048	3.47286
Standard error	3.21458	9.98804	1.0411	1.04127	0.938724	1.19895		1.68115	16.8327	2.06359	1.10728	1.2491	1.31262
CE 400 mg/kg	6.90517	90.1888	6.60275	3.01051	13.6344	8.50525		14.4289	47.4366	4.30022	1.49759	12.4278	7.58767
CE 400 mg/kg	18.0884	48.7638	7.43948	6.18283	6.51521	5.12321		5.11864	52.8787	5.34534	0.872699	3.31312	2.8984
CE 400 mg/kg	1.78648	14.5185	0.305724	0.689918	1.53836	1.02097		9.52042	29.3932	2.52996	0	5.71023	0.96655
CE 400 mg/kg	83.7848	83.8962	50.278	56.4971	52.4943	48.8809		4.32117	37.1069	2.29373	0	3.77013	2.17962
CE 400 mg/kg	16.4988	77.8397	10.4406	6.21115	11.0526	7.73145		5.92953	50.852	5.00201	2.75715	5.4133	3.6545
CE 400 mg/kg	3.63169	42.5668	3.22444	1.0003	7.50314	5.50295		2.41033	66.3554	7.21797	1.67207	4.50583	2.56191
CE 400 mg/kg	2.68449	176.909	0	0	9.47549	0		81.7609	143.241	0	0	8.70592	0
CE 400 mg/kg	2.1069	42.3846	3.30249	0.968617	3.90655	0.755635		3.75164	45.3387	2.86307	1.85328	5.12964	2.30938
Mean	16.9358	72.1335	10.1992	9.32005	13.265	9.69005		15.9052	59.0753	3.69404	1.0816	6.12199	2.76975
Standard deviation	27.7757	49.4248	16.5833	19.2179	16.3103	16.1618		26.8854	35.7185	2.23209	1.03357	3.02676	2.25319
Standard error	9.82019	17.4743	5.86307	6.79456	5.76656	5.71406		9.50544	12.6284	0.789162	0.365423	1.07012	0.796624
