# Supplementary material for: Green Coffee Extract Blockades Haloperidol-Induced Catalepsy and Contralateral Rotations Induced by Apomorphine After Unilateral 6-OHDA Lesion on Striatum
Source: Research Square preprint supplement (doi:10.21203/rs.3.rs-129362/v1), 2020-12-21
Supplement: Supplementary file 4 [file 444b3c73e81c763ddb7f0c7b.docx]

**Green coffee extract blockades haloperidol-induced catalepsy and contralateral rotations induced by apomorphine after unilateral 6-OHDA lesion on striatum**

Graziella Rigueira Molska, Lyvia Izaura Gomes Paula-Freire, Marna Eliana Sakalem, Daniele Oliveira Köhn, Giuseppina Negri, Elisaldo Araújo Carlini, Fúlvio Rieli Mendes


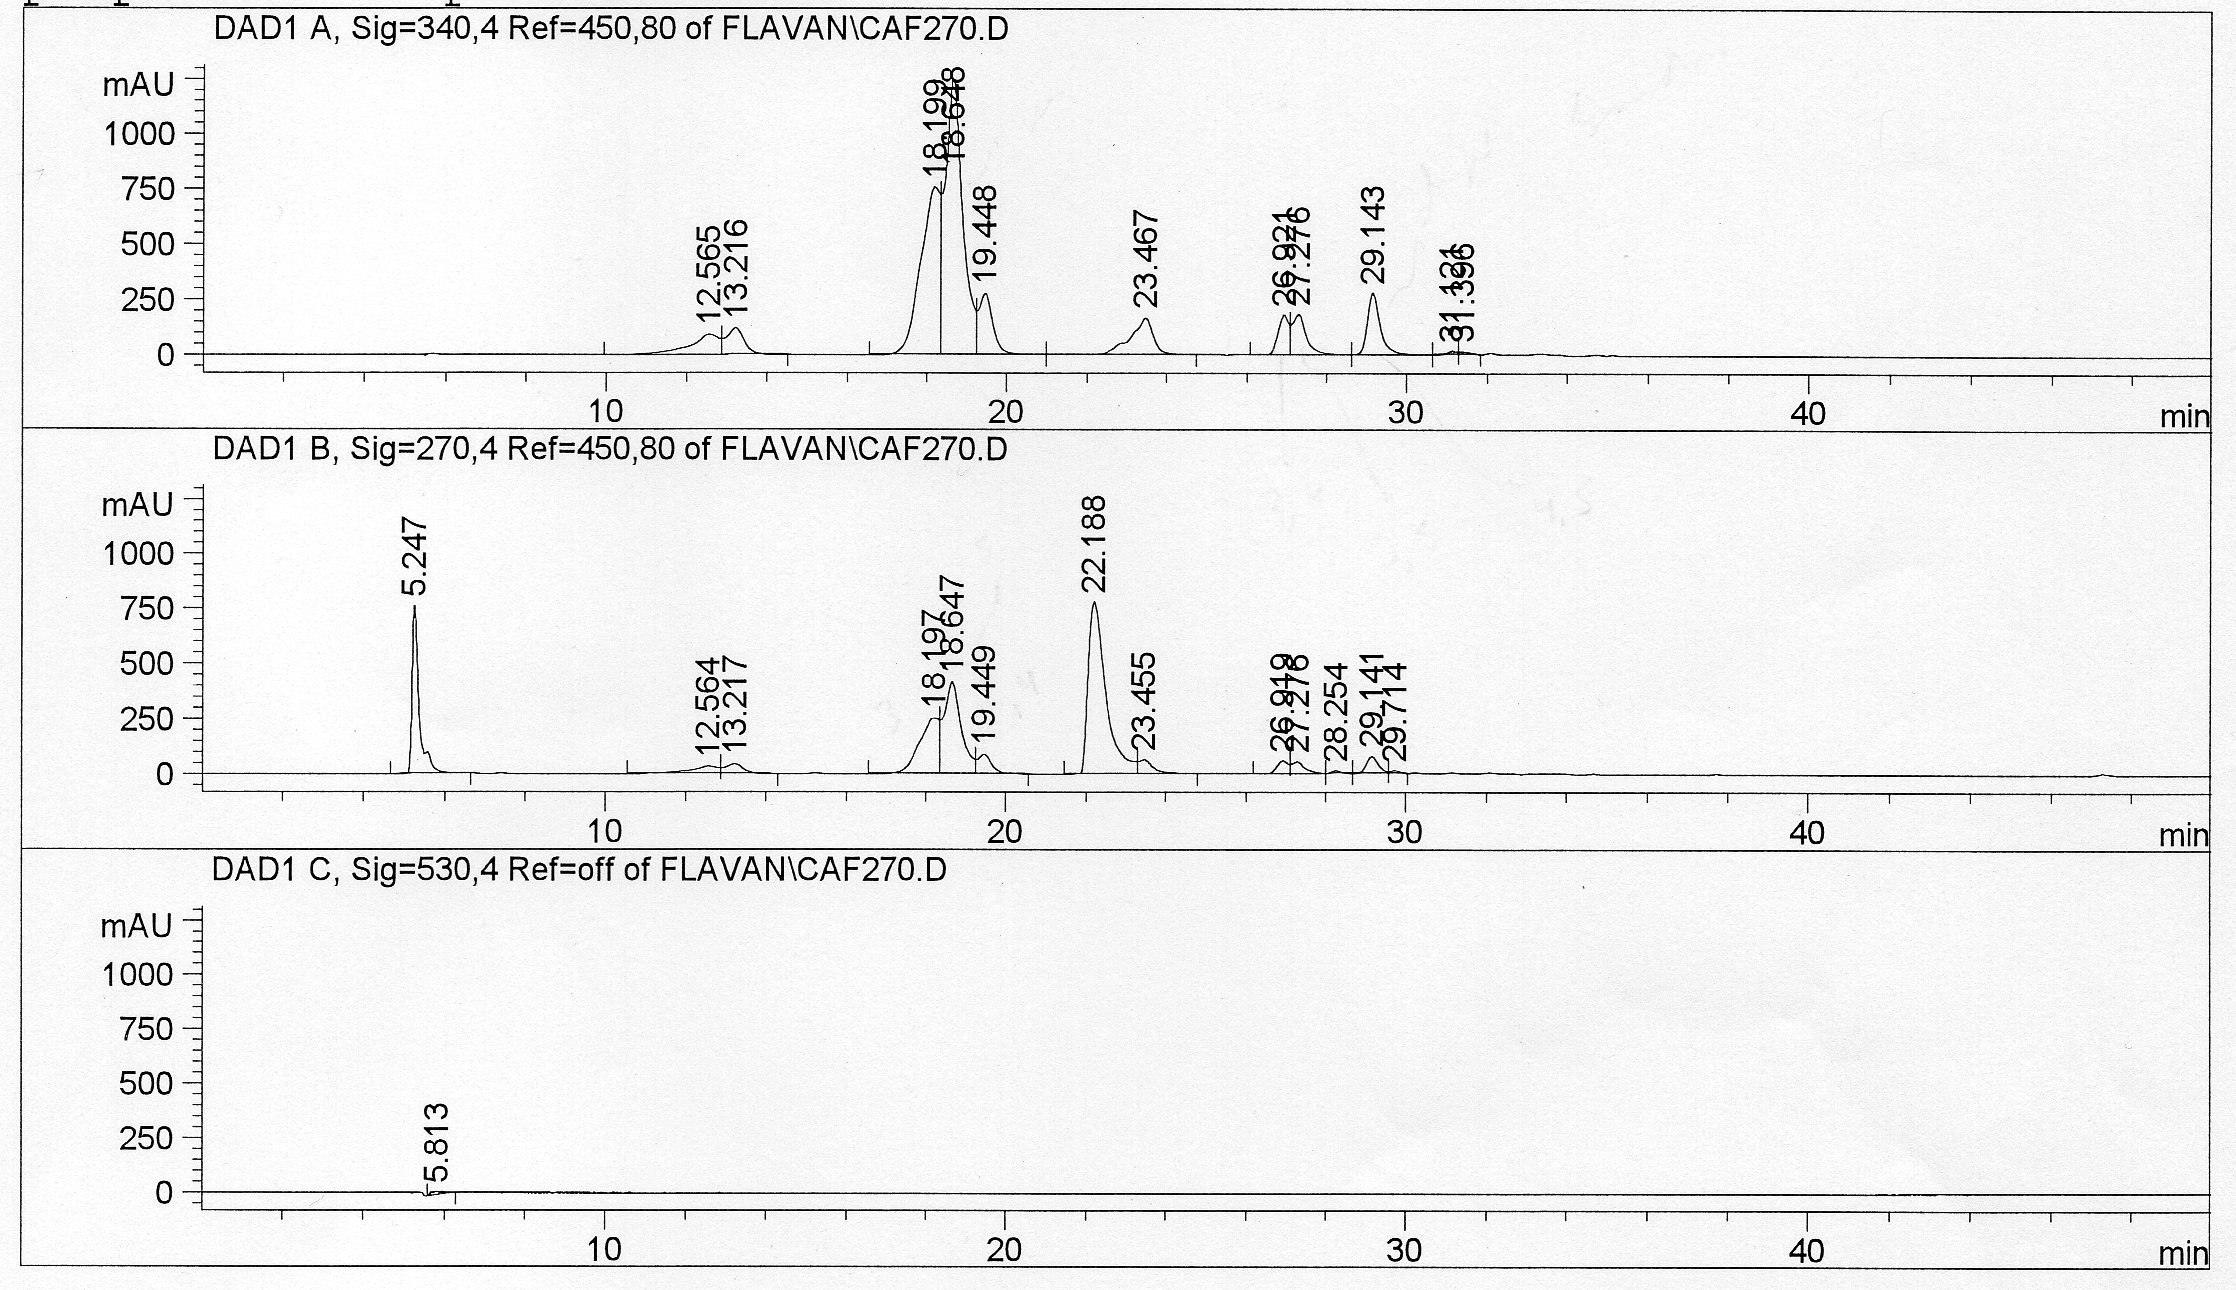


**c**

**b**

**a**

| **Retentiontime (min)** | **HPLC/DAD λmax (nm)** | **Constituents found** |
| --- | --- | --- |
| 5.2 | 300sh -330 | caffeic acid |
| 12.5 | 300sh -330 | 3-O-(E)-caffeoylquinic acid |
| 13.2 | 300sh -330 | 1-O- feruloylquinic acid |
| 18.1 | 300sh -330 | 5-O-(E)-caffeoylquinic acid |
| 18.6 | 300sh -330 | 4-O-(E)-caffeoylquinic acid |
| 19.4 | 300sh -330 | 5-O- feruloylquinic acid |
| 22.1 | 272 | caffeine |
| 23.4 | 300sh -330 | 3-O-(E)-feruloylquinic acid |
| 26.9 | 300sh -330 | 5-O-(E)-feruloylquinic acid |
| 27.2 | 300sh -330 | 3.4-di-O-(E)-caffeoylquinic acid |
| 28.2 | 300sh -330 | 3.5-di-O-(E)-caffeoylquinic acid |
| 29.1 | 330 | 4.5-di-O-(E)- caffeoylquinic acid |

**Supplementary Data S2** Chromatograms containing the peaks of the constituents present in the coffee extract (CE). (**a**): 340 nm; (**b)**: 270 nm; **(c)** Main components found in CE in the wavelength 240-400nm.
